# Supplementary material for: Elastic properties of 2D Ti3C2Tx MXene monolayers and bilayers
Source: PubMed Central journal article supplement — Sci Adv. 2018 Jun 15;4(6):eaat0491. doi: 10.1126/sciadv.aat0491 (PMC6003751; doi:10.1126/sciadv.aat0491), 2018-06-15
Supplement: aat0491_SM.pdf [file aat0491_SM.pdf]

## Supplementary Materials for

### **Elastic properties of 2D $\text{Ti}_3\text{C}_2\text{T}_x$ MXene monolayers and bilayers**

Alexey Lipatov, Haidong Lu, Mohamed Alhabeb, Babak Anasori, Alexei Gruverman, Yury Gogotsi, Alexander Sinitskii

Published 15 June 2018, *Sci. Adv.* **4**, eaat0491 (2018)

DOI: 10.1126/sciadv.aat0491

#### **This PDF file includes:**

- fig. S1.  $\text{Ti}_3\text{C}_2\text{T}_x$  MXene membranes prepared by drop-casting from an aqueous solution.
- fig. S2. Mechanical properties of  $\text{Ti}_3\text{C}_2\text{T}_x$  MXene monolayer on a single flake.
- fig. S3. Mechanical properties of graphene monolayers.

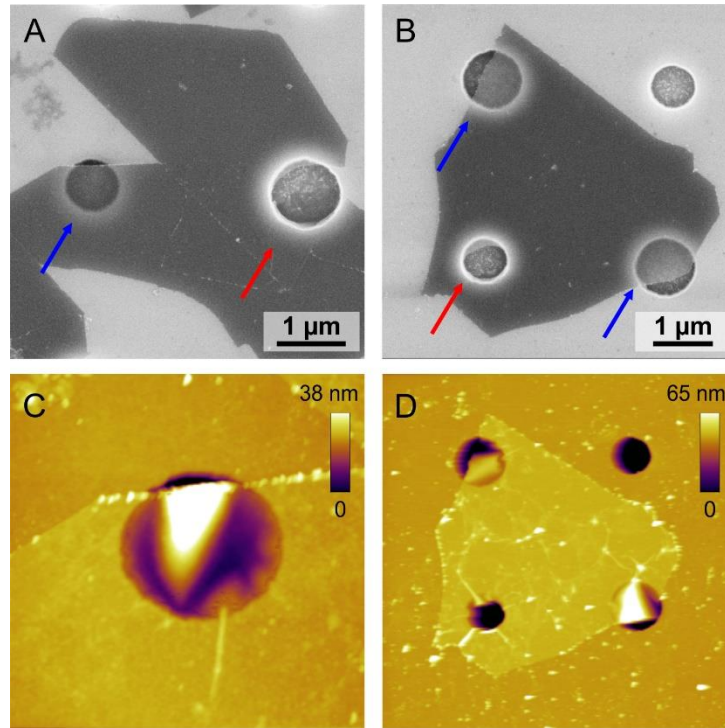

**fig. S1.  $\text{Ti}_3\text{C}_2\text{T}_x$  MXene membranes prepared by drop-casting from an aqueous solution.** (A, B) SEM and (C, D) corresponding AFM images of  $\text{Ti}_3\text{C}_2\text{T}_x$  MXene flakes deposited on a Si/SiO<sub>2</sub> substrate with micro-wells *via* drop casting from an aqueous solution. When flake covers a well during drying, surface tension of water fractures the membrane, see red arrows. Partially covered micro-wells (blue arrows) survive drying but yield crumpled membranes that cannot be used for indentation experiments.

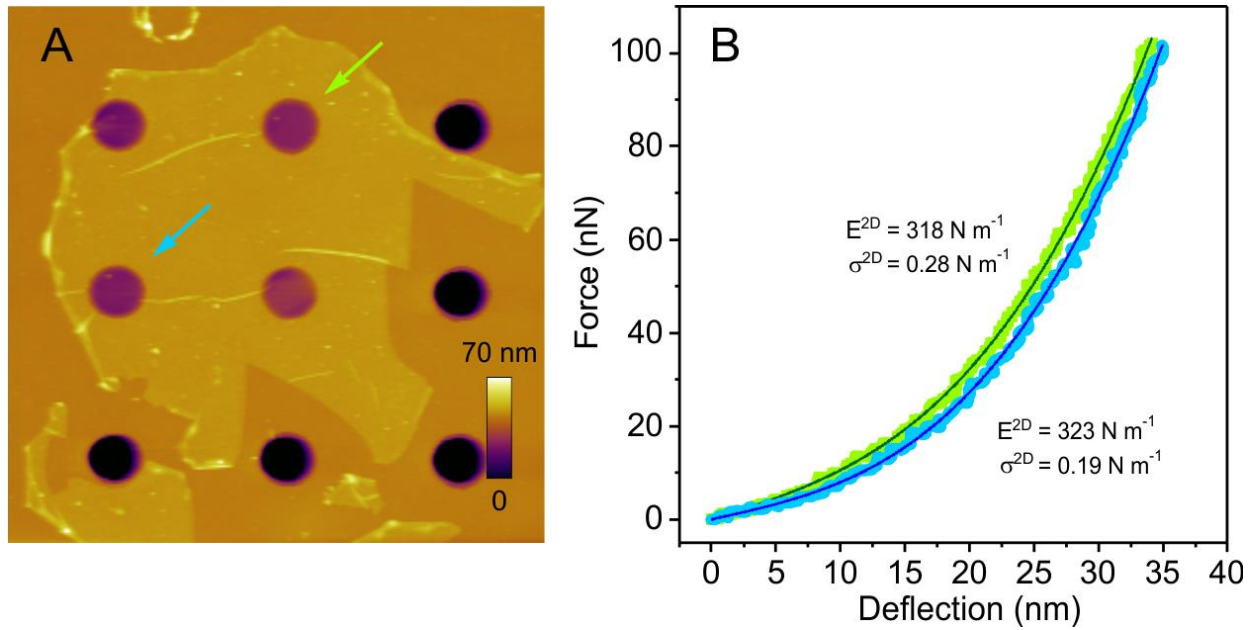

**fig. S2. Mechanical properties of  $\text{Ti}_3\text{C}_2\text{T}_x$  MXene monolayer on a single flake.** (A) Survey AFM image of a substrate showing four membranes formed by one monolayer  $\text{Ti}_3\text{C}_2\text{T}_x$  flake. Two of them were used for the elasticity measurements. (B) Force – deflection curves of MXene membranes shown in (A); the colors of the curves match the colors of arrows in (A). The least squares fit to the experimental indentation curve showed very close  $E^{2D}$  values for these two membranes. Different pretension values cause the slight difference in the force – deflection curves.

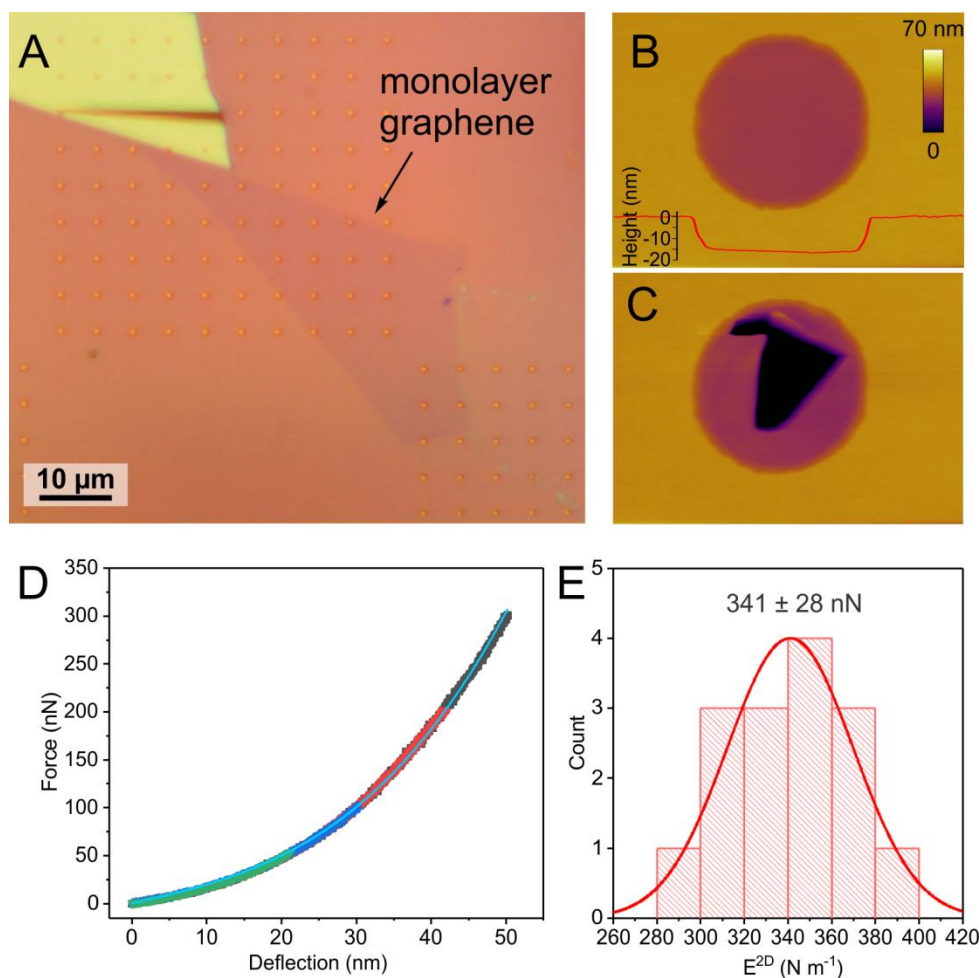

**fig. S3. Mechanical properties of graphene monolayers.** (A) Optical images of exfoliated monolayer graphene flake on Si/SiO<sub>2</sub> substrate with prefabricated wells with a diameter of 0.82 μm. (B, C) AFM images of a graphene-covered well (B) before and (C) after fracture. (D) Force - deflection curves of one of the graphene membranes at different loads. The least squares fit to the experimental indentation curve was performed using Eq. 1 in the main text. (E) Histogram of the elastic stiffness values for monolayer graphene membranes. Solid line represents Gaussian fit to data.
